# Supplementary material
Source: publisher figshare collection journal article supplement (https://gsajournals.figshare.com/ndownloader/files/25667849)
Supplement: Supplementary file 1 [file 25667849]

## Sheet: Sheet1
Table S1: HTT copy numbers in Pacbio assemblies and corresponding ConTExt estimates.
Assembly	Family	Assembly CN	Context estimate
B59	HETA	17	11.7717
B59	HETA-1	7	12.0433
B59	HETA-2	7	9.53492
B59	HETA-3	9	9.20164
B59	HETA-5	7	11.8569
B59	TAHRE	10	12.4146
B59	TART-A	6	9.85301
B59	TART-B1	1	1.26135
B59	TART-C	1	2.41872
I23	HETA	4	3.61209
I23	HETA-1	1	1.38901
I23	HETA-2	1	0
I23	HETA-3	5	6.34396
I23	HETA-5	1	2.4474
I23	TAHRE	4	6.02859
I23	TART-A	3	2.36017
I23	TART-B1	1	2.34287
I23	TART-C	5	7.08163
N25	HETA	10	12.6585
N25	HETA-1	2	0.562369
N25	HETA-2	1	1.35637
N25	HETA-3	6	3.16277
N25	HETA-5	5	10.8836
N25	TAHRE	14	23.4546
N25	TART-A	0	0
N25	TART-B1	6	10.8669
N25	TART-C	0	0
T29A	HETA	4	5.89394
T29A	HETA-1	6	4.12962
T29A	HETA-2	1	1.40991
T29A	HETA-3	0	0
T29A	HETA-5	0	0.774581
T29A	TAHRE	3	4.53289
T29A	TART-A	4	6.74144
T29A	TART-B1	0	0
T29A	TART-C	0	0
ZH26	HETA	6	7.38579
ZH26	HETA-1	5	4.04697
ZH26	HETA-2	4	3.67382
ZH26	HETA-3	0	0.490283
ZH26	HETA-5	9	10.0368
ZH26	TAHRE	2	2.56817
ZH26	TART-A	0	0
ZH26	TART-B1	1	0
ZH26	TART-C	2	3.24038
This table presents for each HTT family, in each of the five Pacbio assemblies, the copy number estimated from BLAST alignments of consensus sequences against the assembly and the copy number that was estimated from applying ConTExt to Illumina data simulated from each assembly.
